# Supplementary material for: The Effect of Reduced Oxygen Saturation on Retinal Microvascularization in COVID-19 Patients with Bilateral Pneumonia Based on Optical Coherence Tomography Study
Source: MDPI journal article supplement (doi:10.3390/jpm12111824), 2022-11-02
Supplement: s1 [file s1]

**Supplementary Table S1.** Comparison of foveal (F) and parafoveal parameters of OCT parameters (RNFL RETINA, GCL, BMCSI, RETINAL THICKNESS, RNFL optic disc) and (optical coherence tomography) OCTA parameters (SCP-superficial capillary plexus, DCP-deep capillary plexus, CC-choriocapillaris, FAZ s - superficial foveal avascular zone, FAZ d - deep foveal avascular zone, F- foveal area, S- superior area, N-nasal area, I-inferior area, T-temporal area, Mean SCP consist of S,N,I,T , Mean DCP consist of S,N,I,T areas , Mean CC consist of S,N,I,T areas, ISR-inner superior ring, IIR-inner inferior ring ,ITR- inner temporal ring, INR-inner nasal ring, OIR-outer inferior ring, OSR-outer superior ring, ONR- outer nasal ring, OTR- outer temporal ring) in COVID-19 patients depending on the level of oxygen saturation [ $\leq 90\%$  (group 1),  $\leq 95\%$  (group 2),  $>95\%$  (group3)]. Mean  $\pm$ SEM (standard error of the mean) structural OCT values. Bold values denote statistical significance at the  $p < 0.05$  level.

| Variables                                    | Total<br>$\bar{X}$ (SEM) | $\leq 90$ (n=10)<br>$\bar{X}$ (SEM) | $\leq 95$ (n=29)<br>$\bar{X}$ (SEM) | $>95$ (n=23)<br>$\bar{X}$ (SEM) | p                    |
|----------------------------------------------|--------------------------|-------------------------------------|-------------------------------------|---------------------------------|----------------------|
| OCT A_F_SCP                                  | 20.71(0.39)              | 22.22(0.77)                         | 20.97(0.54)                         | 19.74(0.70)                     | 0.083                |
| OCT A_F_DCP                                  | 17.22(0.43)              | 18.55(0.77)                         | 16.41(0.50)                         | 17.68(0.81)                     | 0.169                |
| OCT A_F_CC                                   | 51.46(0.38)              | 52.02(0.98)                         | 51.99(0.53)                         | 50.55(0.65)                     | 0.190                |
| OCT A_S_SCP                                  | 48.27(0.25)              | 47.90(0.81)                         | 48.19(0.35)                         | 48.53(0.37)                     | 0.834 <sup>K-W</sup> |
| OCT A_S_DCP                                  | 51.98(0.30)              | 52.28(0.82)                         | 51.83(0.42)                         | 52.05(0.51)                     | 0.860                |
| OCT A_S_CC                                   | 54.06(0.19)              | 53.92(0.51)                         | 54.06(0.25)                         | 54.13(0.35)                     | 0.936                |
| N_SCP (%)                                    | 45.11(0.23)              | 44.32(0.61)                         | 45.38(0.33)                         | 45.10(0.35)                     | 0.277                |
| N_DCP (%)                                    | 49.03(0.27)              | 48.68(0.60)                         | 49.13(0.40)                         | 49.05(0.48)                     | 0.856                |
| N_CC (%)                                     | 53.60(0.19)              | 53.83(0.43)                         | 53.60(0.31)                         | 53.50(0.26)                     | 0.852                |
| I_SCP (%)                                    | 47.20(0.40)              | 46.63(1.02)                         | 47.50(0.40)                         | 47.06(0.86)                     | 0.734                |
| I_DCP (%)                                    | 51.31(0.36)              | 51.35(0.93)                         | 51.66(0.54)                         | 50.85(0.59)                     | 0.599                |
| I_CC (%)                                     | 54.35(0.20)              | 54.39(0.49)                         | 54.64(0.28)                         | 53.95(0.36)                     | 0.304 <sup>K-W</sup> |
| T_SCP (%)                                    | 46.65(0.20)              | 46.24(0.56)                         | 46.59(0.29)                         | 46.91(0.33)                     | 0.728                |
| T_DCP (%)                                    | 47.60(0.23)              | 48.39(0.45)                         | 47.46(0.33)                         | 47.43(0.43)                     | 0.340                |
| T_CC (%)                                     | 53.98(0.17)              | 54.34(0.49)                         | 54.02(0.27)                         | 53.76(0.24)                     | 0.304                |
| Mean SCP (%)                                 | 51.97(0.22)              | 51.83(0.60)                         | 52.20(0.25)                         | 51.75(0.42)                     | 0.494 <sup>K-W</sup> |
| Mean DCP (%)                                 | 54.29(0.24)              | 54.81(0.56)                         | 54.13(0.31)                         | 54.26(0.45)                     | 0.607                |
| Mean CC (%)                                  | 66.86(0.12)              | 67.12(0.35)                         | 67.08(0.15)                         | 66.48(0.22)                     | 0.072 <sup>K-W</sup> |
| FAZs ( $\mu\text{m}^2$ )                     | 326.27(9.84)             | 281.34(14.60)                       | 329.38(15.56)                       | 341.72(16.12)                   | 0.117                |
| FAZd ( $\mu\text{m}^2$ )                     | 354.37(12.83)            | 337.68(26.07)                       | 334.19(16.46)                       | 387.27(24.87)                   | 0.145                |
| RNFL OPTIC DISC_S                            | 132.67(1.33)             | 137.59(1.76)                        | 133.09(1.85)                        | 130.23(2.52)                    | 0.122 <sup>K-W</sup> |
| RNFL OPTIC DISC_N                            | 83.38(1.32)              | 86.00(3.57)                         | 80.79(1.79)                         | 85.66(2.24)                     | 0.169                |
| RNFL OPTIC DISC_I                            | 135.33(1.62)             | 131.94(6.97)                        | 135.57(2.06)                        | 136.34(2.16)                    | 0.920 <sup>K-W</sup> |
| RNFL OPTIC DISC_T                            | 77.11(4.28)              | 68.12(2.19)                         | 82.86(8.81)                         | 73.27(1.49)                     | 0.087 <sup>K-W</sup> |
| Total thickness<br>RNFL OPTIC DISC           | 106.25(0.90)             | 107.29(1.57)                        | 105.88(1.31)                        | 106.32(1.61)                    | 0.829 <sup>K-W</sup> |
| RETINAL THICKNESS F fo-<br>veal              | 245.29(2.32)             | 244.42(4.04)                        | 248.96(2.93)                        | 240.98(4.72)                    | 0.619 <sup>K-W</sup> |
| RETINAL THICKNESS<br>ISR_inner superior ring | 318.46(1.50)             | 320.79(2.54)                        | 318.13(2.36)                        | 317.89(2.54)                    | 0.859 <sup>K-W</sup> |
| RETINAL THICKNESS INR<br>inner nasal ring    | 317.82(1.63)             | 320.58(2.58)                        | 317.71(2.46)                        | 316.77(2.92)                    | 0.778 <sup>K-W</sup> |
| RETINAL THICKNESS<br>IIR_inner inferior ring | 315.33(1.47)             | 315.79(2.40)                        | 314.79(2.41)                        | 315.82(2.35)                    | 0.942                |
| RETINAL THICKNESS ITR<br>inner temporal ring | 304.54(1.89)             | 308.79(2.46)                        | 305.27(2.51)                        | 301.77(3.84)                    | 0.639 <sup>K-W</sup> |
| RETINAL THICKNESS OSR<br>outer superior ring | 277.76(1.41)             | 278.37(2.00)                        | 277.21(1.93)                        | 278.20(2.80)                    | 0.691 <sup>K-W</sup> |
| RETINAL THICKNESS<br>ONR outer nasal ring    | 290.71(1.50)             | 292.58(2.37)                        | 290.27(2.47)                        | 290.45(2.42)                    | 0.863                |

|                                              |              |               |               |               |                       |
|----------------------------------------------|--------------|---------------|---------------|---------------|-----------------------|
| RETINAL THICKNESS OIR<br>outer inferior ring | 266.13(1.22) | 266.21(1.84)  | 268.07(2.07)  | 263.64(1.76)  | 0.254 <sup>K-W</sup>  |
| RETINAL THICKNESS<br>OTR outer temporal ring | 259.80(1.48) | 264.42(1.90)  | 261.98(1.97)  | 255.02(2.90)  | 0.056 <sup>K-W</sup>  |
| RNFL RETINA F                                | 3.58(0.23)   | 3.26(0.42)    | 3.98(0.40)    | 3.20(0.29)    | 0.318 <sup>K-W/</sup> |
| RNFL RETINA ISR                              | 29.15(0.24)  | 29.53(0.67)   | 28.91(0.33)   | 29.30(0.41)   | 0.617                 |
| RNFL RETINA INR                              | 24.26(0.21)  | 24.11(0.42)   | 24.13(0.35)   | 24.50(0.32)   | 0.357 <sup>K-W</sup>  |
| RNFL RETINA IIR                              | 29.52(0.32)  | 28.89(0.48)   | 29.19(0.58)   | 30.25(0.40)   | 0.114 <sup>K-W</sup>  |
| RNFL RETINA ITR                              | 20.03(0.24)  | 20.47(0.57)   | 20.04(0.34)   | 19.84(0.43)   | 0.682                 |
| RNFL RETINA OSR                              | 41.82(0.53)  | 41.89(1.14)   | 41.63(0.88)   | 42.05(0.77)   | 0.662 <sup>K-W</sup>  |
| RNFL RETINA ONR                              | 52.52(0.77)  | 51.74(1.73)   | 51.95(1.13)   | 53.59(1.30)   | 0.567                 |
| RNFL RETINA OIR                              | 43.70(0.63)  | 43.00(0.93)   | 43.96(1.09)   | 43.66(0.90)   | 0.870                 |
| RNFL RETINA OTR                              | 23.11(0.36)  | 23.63(0.54)   | 22.79(0.39)   | 23.30(0.81)   | 0.451 <sup>K-W</sup>  |
| GCL F                                        | 50.61(1.07)  | 50.63(1.68)   | 52.38(1.91)   | 48.36(1.37)   | 0.561 <sup>K-W</sup>  |
| GCL ISR                                      | 122.66(0.86) | 122.37(1.51)  | 122.27(1.38)  | 123.30(1.40)  | 0.855 <sup>K-W</sup>  |
| GCL INR                                      | 118.09(0.89) | 117.63(1.50)  | 117.70(1.40)  | 118.80(1.48)  | 0.783                 |
| GCL IIR                                      | 121.63(1.33) | 120.53(1.52)  | 119.91(2.52)  | 124.30(1.45)  | 0.328 <sup>K-W</sup>  |
| GCL ITR                                      | 110.71(0.86) | 111.37(1.35)  | 110.82(1.13)  | 110.27(1.74)  | 0.957 <sup>K-W</sup>  |
| GCL OSR                                      | 106.42(0.85) | 105.68(1.50)  | 106.61(1.44)  | 106.50(1.27)  | 0.927 <sup>K-W</sup>  |
| GCL ONR                                      | 122.32(1.06) | 120.53(1.85)  | 122.29(1.71)  | 123.14(1.69)  | 0.715                 |
| GCL OIR                                      | 105.64(0.91) | 104.26(1.30)  | 107.02(1.59)  | 104.48(1.27)  | 0.362                 |
| GCL OTR                                      | 93.08(0.73)  | 94.05(1.14)   | 93.63(1.17)   | 91.95(1.22)   | 0.498                 |
| BMCSI F                                      | 267.10(6.51) | 274.74(15.03) | 269.23(9.05)  | 261.09(11.79) | 0.750                 |
| BMCSI ISR                                    | 268.67(5.88) | 279.53(10.88) | 271.07(8.74)  | 260.93(10.38) | 0.335 <sup>K-W</sup>  |
| BMCSI INR                                    | 250.39(6.25) | 253.63(14.82) | 254.45(9.14)  | 243.82(10.62) | 0.726 <sup>K-W</sup>  |
| BMCSI IIR                                    | 257.39(6.43) | 255.05(14.59) | 260.70(9.40)  | 254.18(11.11) | 0.890                 |
| BMCSI ITR                                    | 258.55(6.25) | 259.05(12.62) | 259.43(8.86)  | 257.20(11.56) | 0.771 <sup>K-W</sup>  |
| BMCSI OSR                                    | 266.07(5.44) | 260.26(10.06) | 266.59(7.64)  | 267.91(10.31) | 0.894                 |
| BMCSI ONR                                    | 201.08(6.14) | 196.95(13.50) | 207.20(9.45)  | 195.09(9.96)  | 0.644                 |
| BMCSI OIR                                    | 240.55(6.41) | 229.95(11.06) | 245.61(10.20) | 238.70(10.58) | 0.688                 |
| BMCSI OTR                                    | 237.92(5.68) | 232.21(10.49) | 237.82(8.78)  | 240.52(9.67)  | 0.991 <sup>K-W</sup>  |

K-W- Kruskal-Wallis non-parametric analysis of variance
