# Supplementary material for: The Effect of Reduced Oxygen Saturation on Retinal Microvascularization in COVID-19 Patients with Bilateral Pneumonia Based on Optical Coherence Tomography Study
Source: MDPI journal article supplement (doi:10.3390/jpm12111824), 2022-11-02
Supplement: s1 [file s1]

**Supplementary Table S2.** The correlation between oxygen saturation (%) and foveal, parafoveal OCT parameters (RNFL RETINA, GCL, BMCSI, RETINAL THICKNESS, RNFL optic disc) and OCTA parameters (SCP-superficial capillary plexus, DCP-deep capillary plexus, CC-choriocapillaris, FAZ s – superficial foveal avascular zone, FAZ d- deep foveal avascular zone, F- foveal area, S- superior area, N-nasal area, I-inferior area, T-temporal area, Mean SCP consist of S,N,I,T , Mean DCP consist of S,N,I,T areas , Mean CC consist of S,N,I,T areas) in COVID-19 patients. Mean  $\pm$ SEM (standard error of the mean) structural OCT values. Bold values denote statistical significance at the  $p < 0.05$  level.

| Variables                          | Oxygen saturation | p                                                                                      |
|------------------------------------|-------------------|----------------------------------------------------------------------------------------|
| OCT A F SCP                        | <b>-0.22</b>      | <b>0.016<sup>P</sup></b>                                                               |
| OCT A F DCP(LOG10)                 | -0.13             | 0.171 <sup>P</sup>                                                                     |
| OCT A F CC                         | -0.11             | 0.215 <sup>Sp</sup>                                                                    |
| OCT A S SCP                        | 0.08              | 0.357 <sup>Sp</sup>                                                                    |
| OCT A S DCP                        | -0.01             | 0.950 <sup>Sp</sup>                                                                    |
| OCT A S CC                         | -0.01             | 0.896 <sup>Sp</sup>                                                                    |
| N SCP (%)                          | 0.11              | 0.208 <sup>Sp</sup>                                                                    |
| N DCP (%)                          | 0.01              | 0.943 <sup>P</sup>                                                                     |
| N CC (%)                           | -0.05             | 0.564 <sup>P</sup>                                                                     |
| I SCP (%)                          | 0.13              | 0.175 <sup>Sp</sup>                                                                    |
| I DCP (%)                          | -0.08             | 0.373 <sup>Sp</sup>                                                                    |
| I CC (%)                           | -0.08             | 0.351 <sup>P</sup>                                                                     |
| T SCP (%)                          | 0.07              | 0.436 <sup>P</sup>                                                                     |
| T DCP (%)                          | -0.16             | 0.085 <sup>P</sup><br>(for saturation level $\leq 90\%$ : $r = -0.47$ ; $p = 0.045$ )  |
| T CC (%)                           | -0.12             | 0.181 <sup>Sp</sup><br>(for saturation level $\leq 90\%$ : $r = -0.59$ ; $p = 0.007$ ) |
| Mean SCP (%)                       | 0.02              | 0.867 <sup>Sp</sup>                                                                    |
| Mean DCP (%)                       | -0.15             | 0.113 <sup>P</sup> (for saturation level $\leq 90\%$ : $r = -0.55$ ; $p = 0.016$ )     |
| Mean CC (%)                        | -0.14             | 0.115 <sup>Sp</sup>                                                                    |
| FAZs ( $\mu m^2$ )                 | <b>-0.20</b>      | 0.025 <sup>P</sup>                                                                     |
| FAZd ( $\mu m^2$ )                 | 0.14              | 0.138 <sup>Sp</sup>                                                                    |
| RNFL OPTIC DISC S                  | -0.13             | 0.175 <sup>Sp</sup><br>(for saturation level $\leq 90\%$ : $r = -0.65$ ; $p = 0.005$ ) |
| RNFL OPTIC DISC N                  | 0.08              | 0.367 <sup>P</sup>                                                                     |
| RNFL OPTIC DISC I                  | 0.02              | 0.802 <sup>Sp</sup>                                                                    |
| RNFL OPTIC DISC T                  | 0.10              | 0.262 <sup>Sp</sup><br>(for saturation level $\leq 90\%$ : $r = -0.60$ ; $p = 0.012$ ) |
| Total thickness<br>RNFL OPTIC DISC | -0.03             | 0.767 <sup>P</sup>                                                                     |
| F RETINAL THICKNESS                | -0.07             | 0.474 <sup>Sp</sup>                                                                    |
| RETINAL THICKNESS ISR              | -0.06             | 0.537 <sup>Sp</sup><br>(for saturation level $\leq 90\%$ : $r = 0.50$ ; $p = 0.029$ )  |
| RETINAL THICKNESS INR              | 0.06              | 0.505 <sup>P</sup>                                                                     |
| RETINAL THICKNESS IIR              | 0.04              | 0.680 <sup>P</sup>                                                                     |
| RETINAL THICKNESS ITR              | -0.09             | 0.309 <sup>Sp</sup><br>(for saturation level $\leq 90\%$ : $r = 0.49$ ; $p = 0.034$ )  |
| RETINAL THICKNESS OSR              | -0.05             | 0.579 <sup>Sp</sup><br>(for saturation level $\leq 90\%$ : $r = 0.56$ ; $p = 0.012$ )  |
| RETINAL THICKNESS ONR              | -0.07             | 0.457 <sup>Sp</sup>                                                                    |

|                       |       |                                                                                                                        |
|-----------------------|-------|------------------------------------------------------------------------------------------------------------------------|
| RETINAL THICKNESS OIR | -0.02 | 0.816 <sup>P</sup>                                                                                                     |
| RETINAL THICKNESS OTR | -0.07 | 0.446 <sup>P</sup><br>(for saturation level ≤90 %: r=0.62;p=0.004)                                                     |
| RNFL RETINA F         | -0.07 | 0.497 <sup>Sp</sup>                                                                                                    |
| RNFL RETINA ISR       | -0.01 | 0.904 <sup>P</sup>                                                                                                     |
| RNFL RETINA INR       | 0.11  | 0.237 <sup>Sp</sup>                                                                                                    |
| RNFL RETINA IIR       | 0.13  | 0.162 <sup>Sp</sup><br>(for saturation level ≤ 90%; r=0.50; p=0.030)                                                   |
| RNFL RETINA ITR       | -0.08 | 0.407 <sup>Sp</sup><br>(for saturation level ≤90 %: r=0.50; p=0.032)                                                   |
| RNFL RETINA OSR       | 0.09  | 0.334 <sup>Sp</sup>                                                                                                    |
| RNFL RETINA ONR       | 0.05  | 0.602 <sup>P</sup>                                                                                                     |
| RNFL RETINA OIR       | 0.004 | 0.958 <sup>P</sup>                                                                                                     |
| RNFL RETINA OTR       | -0.02 | 0.826 <sup>Sp</sup>                                                                                                    |
| GCL F                 | -0.11 | 0.224 <sup>Sp</sup>                                                                                                    |
| GCL ISR               | 0.06  | 0.538 <sup>Sp</sup><br>(for saturation level ≤ 90%: r=0.53;p=0.02 )                                                    |
| GCL INR               | 0.07  | 0.456 <sup>Sp</sup>                                                                                                    |
| GCL IIR               | 0.15  | 0.109 <sup>Sp</sup> (for saturation level ≤ 90%: r=0.46;p=0.047)                                                       |
| GCL ITR               | 0.01  | 0.955 <sup>Sp</sup>                                                                                                    |
| GCL OSR               | 0.10  | 0.278 <sup>Sp</sup>                                                                                                    |
| GCL ONR               | 0.08  | 0.386 <sup>P</sup>                                                                                                     |
| GCL OIR               | 0.03  | 0.700 <sup>P</sup><br>(for saturation level: 90%-95%; r=0.33; p=0.012)                                                 |
| GCL OTR               | 0.003 | 0.974 <sup>P</sup>                                                                                                     |
| BMCSI F               | -0.01 | 0.899 <sup>P</sup>                                                                                                     |
| BMCSI ISR             | -0.04 | 0.657 <sup>P</sup>                                                                                                     |
| BMCSI INR             | -0.02 | 0.862 <sup>P</sup>                                                                                                     |
| BMCSI IIR             | 0.04  | 0.658 <sup>P</sup>                                                                                                     |
| BMCSI ITR             | 0.03  | 0.720 <sup>P</sup>                                                                                                     |
| BMCSI OSR             | 0.09  | 0.328 <sup>P</sup>                                                                                                     |
| BMCSI ONR             | 0.11  | 0.223 <sup>P</sup><br>(for saturation level: ≤90%; r=0.52;p=0.021;<br>for saturation level: 90%-95%: r= -0.38;p=0.007) |
| BMCSI OIR             | 0.08  | 0.407 <sup>P</sup>                                                                                                     |
| BMCSI OTR             | 0.08  | 0.365 <sup>P</sup>                                                                                                     |

<sup>Sp</sup>-Spearman rank correlation, <sup>P</sup>- Pearson correlation
